# Supplementary material for: Fast microglial activation after severe traumatic brain injuries
Source: PubMed Central journal article supplement (PMC7578125; doi:10.1007/s00414-020-02308-x), 2020-05-05
Supplement: 414_2020_2308_MOESM1_ESM.pdf [file 414_2020_2308_MOESM1_ESM.pdf]

## Supplemental material to:

### Fast microglial activation after severe traumatic brain injuries

Julia Lier <sup>1\*</sup>, Benjamin Ondruschka <sup>2\*.#</sup>, Ingo Bechmann <sup>1</sup>, Jan Dreßler <sup>2</sup>

<sup>1</sup> Institute of Anatomy, University of Leipzig, Liebigstraße 13, D-04103 Leipzig

<sup>2</sup> Institute of Legal Medicine, University of Leipzig, Johannisallee 28, D-04103 Leipzig

\* These authors contributed equally to this work as first authors.

# Corresponding author

#### Corresponding Author:

PD Dr. med. Benjamin Ondruschka

University of Leipzig

Institute of Legal Medicine

Johannisallee 28

04103 Leipzig

Email: benjamin.ondruschka@medizin.uni-leipzig.de

Phone: (+49) 341 9715152

Supplemental Table 1: Antibodies used in the study.

| <b>Antibody</b>      | <b>Dilution</b> | <b>Host</b> | <b>Company<br/>(headquarter, country)</b>  | <b>Catalogue<br/>number</b> |
|----------------------|-----------------|-------------|--------------------------------------------|-----------------------------|
| Primary antibodies   |                 |             |                                            |                             |
| Ferritin             | 1:300           | rabbit      | Sigma-Aldrich<br>(St. Louis, USA)          | F6136                       |
| Iba-1                | 1:400           | rabbit      | Synaptic Systems<br>(Göttingen, Germany)   | 234 003                     |
| MHCII                | 1:300           | mouse       | Agilent Dako<br>(Santa Clara, USA)         | M0775                       |
| GPX1                 | 1:80            | goat        | R&D Systems<br>(Minneapolis, USA)          | AF3798                      |
| CD68                 | 1:300           | mouse       | Agilent Dako<br>(Santa Clara, USA)         | M0876                       |
| AT-8                 | 1:500           | mouse       | Thermo Fisher Scientific<br>(Waltham, USA) | MN1020                      |
| Beta-Amyloid         | 1:500           | mouse       | Sigma-Aldrich<br>(St. Louis, USA)          | A8354                       |
| Secondary antibodies |                 |             |                                            |                             |
| Anti-rabbit          | 1:100           | goat        | Vector Laboratories<br>(Burlingame, USA)   | BA-1000                     |
| Anti-mouse           | 1:100           | goat        | Sigma-Aldrich<br>(St. Louis, USA)          | B7264                       |
| Anti-goat            | 1:100           | rabbit      | Sigma-Aldrich<br>(St. Louis, USA)          | B7014                       |

Supplemental Table 2: Overview on staining results in all cases.

| Case No.                                  | Microglial morphology                                 |                                | IBA1      |              | MHCII     |                  | GPX1 | CD68             | Ferritin | HE / Nissl                                        |
|-------------------------------------------|-------------------------------------------------------|--------------------------------|-----------|--------------|-----------|------------------|------|------------------|----------|---------------------------------------------------|
|                                           | Contusion                                             | Control area                   | Contusion | Control area | Contusion | Control area     |      |                  |          |                                                   |
| <b>Traumatic Brain Injury Cases (n=8)</b> |                                                       |                                |           |              |           |                  |      |                  |          |                                                   |
| 1                                         | Dystrophic, activated                                 | Ramified                       | +++       | +++          | +         | -                | -    | -                | -        | Tissue rupture visible                            |
| 2                                         | Activated, apparent migration movement towards lesion | Ramified                       | ++        | ++           | -         | -                | -    | +                | -        | Few intraparenchymal hemorrhages                  |
| 3                                         | Activated, dystrophic                                 | Ramified, activated            | +++       | +++          | +++++     | ++               | -    | + (perivascular) | +        | Multiple intraparenchymal hemorrhages             |
| 4                                         | Activated, partially amoeboid, dystrophic             | Ramified                       | +++       | ++           | +++       | +                | -    | ++               | -        | Few intraparenchymal hemorrhages                  |
| 5                                         | Activated, dystrophic, partially ramified             | Ramified                       | ++        | ++           | ++        | +++              | -    | -                | -        | Severe intraparenchymal hemorrhages               |
| 6                                         | Activated, partially amoeboid                         | Ramified                       | ++        | ++           | +         | -                | -    | -                | -        | Intraparenchymal hemorrhages, dilated capillaries |
| 7                                         | Activated, ramified                                   | Ramified                       | +         | ++           | +++       | ++               | -    | -                | -        | Severe brain edema                                |
| 8                                         | Activated, amoeboid                                   | Ramified, activated            | +++       | ++           | ++        | -                | ++   | ++               | +        | Pronounced hemorrhage                             |
| <b>Control cases (n=5)</b>                |                                                       |                                |           |              |           |                  |      |                  |          |                                                   |
| 9                                         |                                                       | Ramified, partially dystrophic |           | +            |           | + (perivascular) | -    | + (perivascular) | -        | w/o hemorrhages                                   |
| 10                                        |                                                       | Ramified                       |           | ++           |           | -                | -    | +                | -        | w/o hemorrhages                                   |
| 11                                        |                                                       | Ramified                       |           | ++           |           | + (perivascular) | -    | -                | -        | w/o hemorrhages                                   |
| 12                                        |                                                       | Ramified                       |           | ++           |           | + (perivascular) | -    | -                | -        | w/o hemorrhages                                   |
| 13                                        |                                                       | Ramified, partially dystrophic |           | ++           |           | + (perivascular) | -    | + (perivascular) | -        | w/o hemorrhages                                   |
